# Supplementary material for: Psychopathy, pain, and pain empathy: A psychophysiological study
Source: PLoS One. 2024 Jul 5;19(7):e0306461. doi: 10.1371/journal.pone.0306461 (PMC11226074; doi:10.1371/journal.pone.0306461)
Supplement: S1 Dataset — (XLSX) [file pone.0306461.s004.xlsx]

## Sheet: Sheet1
Participant	PsychGroup	Age	Sex	Screening_total	Handedness	Touch	Threshold	Moderate	Boldness	Meanness	Disinhibition	TriPm_Total	Fantasy	Empathic_Concern	Perspective_Taking	Personal_Distress	IRI_Total	Dishonest_Charm	Grandiosity	Lying	Manipulation	Remorselessness	Unemotional	Callousness	Thrill_Seeking	Impulsiveness	Irresponsibility	YPI_Total	pain_gsr_high_sqrt	pain_gsr_low_sqrt	empathy_gsr_non_sqrt	empathy_gsr_pain_sqrt	pain_beh_high	pain_beh_med	pain_beh_low	empathy_beh_pain	empathy_beh_non
MM01	1	23	2	75	1	1.4	2.3	3	31	5	10	46	16	23	25	9	73	8	7	6	6	6	8	7	13	9	5	75	1	1	1.01472	7.06464	81	61.2	18.3	48.9091	30.4444
MM02	1	25	2	73	2	1	1.5	2.2	20	3	8	31	23	26	23	22	94	8	8	7	6	5	7	6	10	10	6	73	1.01079	1.00479	1.02378	8.41427	73.1	28.9	9.5	69.8	10.9333
MM03	1	22	2	70	1	1.2	1.8	2.7	9	4	11	24	26	22	21	20	89	7	5	7	7	5	5	5	10	9	10	70	1.07838	1.07299	1.02336	7.79744	82.4	17.9	4.8	59.8	5.93333
MM04	1	46	1	67	1	1.2	1.8	2.7	40	4	7	51	16	27	25	7	75	5	5	6	7	6	9	6	10	7	6	67	1.08651	1	1.03221	6.23966	69.1	43.6	6.7	37.9333	0.866667
MM05	2	25	2	141	1	1	1.6	2.1	36	28	24	88	10	9	9	8	36	11	13	16	11	15	15	16	15	17	12	141	1.18748	1.07981	1.11101	3.64234	71.2	31.7	9.1	12.2667	0.133333
MM06	1	23	2	78	1	1.2	1.7	2.1	20	4	7	31	22	19	22	17	80	6	7	9	5	9	5	9	10	11	7	78	1.09741	1.02879	1.00446	7.81452	64.5	33.9	18.2	60.0667	4.8
MM07	2	26	1	144	1	1.8	2.7	3.5	50	45	19	114	22	19	22	16	79	15	13	11	15	16	14	15	18	16	11	144	1.03373	1.0031	1.01097	4.25049	28	22.8	14.9	17.0667	0.133333
MM08	1	18	2	71	1	1.2	1.8	2.6	17	5	10	32	17	25	16	13	71	5	5	6	5	5	6	5	12	14	8	71	1.15195	1.04933	1.04358	8.62941	56.3	29.6	12.2	73.4667	0.466667
MM09	1	45	1	75	1	1.2	1.8	2.7	36	12	9	57	18	21	15	9	63	6	7	6	5	5	9	9	9	10	9	75	1	1.01656	1.0668	2.73252	52.1	31.5	14.5	6.46667	0.266667
MM11	1	24	2	77	1	1	1.6	2.3	35	10	8	53	20	23	17	8	68	7	5	5	5	5	10	5	14	12	9	77	1.00504	1.08963	1.02307	7.69415	57.6	34.1	8.4	58.2	3.46667
MM12	2	22	1	137	1	1.8	2.6	3.5	26	29	35	90	18	19	20	11	68	14	14	14	13	11	15	12	15	13	16	137	1.12579	1.09823	1.11612	7.80171	34.3	29.1	13.3	59.8667	27.4667
MM13	1	25	2	83	1	1.2	1.8	2.7	17	5	18	40	21	19	19	8	67	5	8	8	5	7	7	9	11	12	11	83	1	1	1	6.5676	78.1	54.6	28.5	42.1333	0
MM14	1	23	2	62	1	1.2	1.8	2.5	26	29	35	90	18	19	20	11	68	5	7	7	5	5	7	5	8	7	6	62	1.02122	1.01809	1.02596	6.3927	56.5	26.7	5.1	39.8667	15.3333
MM15	1	28	1	76	1	1.2	1.8	3.3	27	3	3	34	26	20	20	7	73	8	8	5	6	7	11	8	10	7	6	76	1.15572	1.10977	1.10281	7.02851	68.4	33.9	20.7	48.4	3.06667
SA01	2	21	1	136	1	1.8	2.7	3.4	33	31	21	85	22	18	17	8	65	15	16	16	16	9	11	9	18	12	14	136	1.11216	1.09877	1.05663	3.90726	56.6	46.7	14.5	14.2667	0.133333
SA02	2	24	1	138	1	1.4	2.2	2.6	23	12	15	50	14	18	21	11	64	16	17	15	15	12	10	13	15	13	10	136	1.21721	1	1.0307	9.12871	74	30.5	5.3	82.3333	9.6
SA03	2	21	2	137	1	1.2	1.8	2.9	47	22	25	94	23	9	8	2	42	11	16	12	10	10	16	14	19	14	15	137	1.08826	1.00499	1.02219	6.19139	26.6	7.2	1.8	37.3333	12.6
SA04	1	22	1	67	1	1.6	2.4	3.2	18	1	5	24	13	25	27	18	83	5	6	5	5	5	8	5	11	12	5	67	1.01509	1.05943	1.01364	8.74833	57.5	35.5	13.6	75.5333	8.66667
SA05	2	22	1	142	2	1.5	2.2	3.1	32	32	35	99	28	18	11	10	67	14	10	19	15	15	10	11	18	17	13	142	1.16812	1.06047	1.04061	8.04156	64.2	35.3	15.5	63.6667	14.2
SA06	2	32	1	133	1	1.5	2.2	3.5	53	21	18	92	25	15	23	5	68	12	15	12	11	14	16	12	14	13	14	133	1.01139	1.02235	1.00243	1.96638	78.5	34.8	16.4	2.86667	2.2
SA07	2	24	1	126	1	2	3	3.5	38	30	19	87	14	17	17	5	53	12	10	9	10	12	16	12	18	13	14	126	1.10973	1.11032	1.12866	3.47371	46.4	37.9	13.1	11.0667	1.06667
SA08	2	26	2	128	1	1.5	2.4	3.3	30	17	21	68	19	25	15	10	69	15	15	16	15	9	9	8	16	11	14	128	1.01828	1.01232	1	7.68548	32.1	11.7	30.2	58.0667	1.93333
SA09	1	55	1	68	1	1.6	2.2	2.8	37	4	11	52	11	16	20	11	58	7	5	6	7	5	9	6	7	9	7	68	1.07685	1.16095	1.08167	8.89944	38.4	9.1	42.5	78.2	5.86667
SA10	1	28	2	74	1	1	1.2	1.7	18	9	10	37	18	16	15	15	64	7	6	7	5	9	6	10	10	7	7	74	1.12071	1.1015	1.00236	8.89944	54.4	15.3	56.4	78.2	5.86667
SA11	1	24	2	71	1	1	1.6	2.1	24	2	5	31	21	24	22	16	83	7	8	5	5	5	7	6	10	10	8	71	1	1	1.03299	7.61577	34.4	7.3	44.1	57	0.2
SA12	2	28	1	121	1	1.7	2.6	3.4	39	26	15	80	12	11	17	4	44	13	15	10	12	10	14	13	12	11	11	121	1	1.0175	1.00203	4.7399	54.8	28.6	12.8	21.4667	0
SA13	1	22	2	69	1	1.2	1.8	2.4	13	1	12	26	24	27	24	18	93	6	5	8	6	5	6	7	9	8	9	69	1	1	1	9.38083	76.3	40.3	10.1	87	7.2
SA14	2	20	2	126	1	1	1.4	2.2	38	30	26	94	22	17	16	11	66	11	12	12	14	12	12	11	15	13	14	126	1.22638	1.00757	1.03486	5.57973	62.2	28.6	10.6	30.1333	1.33333
SA15	2	24	1	120	1	1	1.4	2.2	39	24	8	71	21	7	23	6	57	17	16	14	15	12	10	8	12	9	7	120	1.00344	1.02127	1.05189	7.13676	71.4	33.4	17.7	49.9333	3.4
SA16	2	29	2	125	2	0.7	1.1	1.5	34	24	21	79	20	16	19	12	67	15	13	11	14	11	14	11	16	10	10	125	1.10784	1.0198	1.01186	8.1035	60.6	26.6	15.6	64.6667	6.8
SA17	1	20	2	74	1	1	1.4	2.5	30	10	13	53	22	27	19	19	87	5	5	5	5	5	7	6	14	13	9	74	1.06541	1.00548	1.07496	7.15076	59.8	7.1	0.7	50.1333	1.66667
SA18	1	21	2	78	1	1	1.6	2.6	34	9	27	70	17	22	19	10	68	5	7	6	5	5	11	9	16	8	6	78	1.13789	1.05811	1.04387	5.35413	48.9	12.6	4.7	27.6667	0.333333
SA19	2	21	1	125	2	1.6	2.5	3.5	27	14	32	73	12	21	19	12	64	12	9	14	10	10	11	11	17	18	13	125	1.12574	1.10811	1.00638	4.28952	50.9	41	19.2	17.4	6.13333
SA20	2	23	1	154	1	1	1.4	2.2	47	39	26	15	80	12	11	17	4	16	14	16	14	15	14	14	17	17	17	154	1.07401	1.06203	1.08256	5.92734	49.8	27.6	8.4	34.1333	0
SA21	1	48	2	78	1	1	1	1.4	24	20	4	7	31	22	19	22	17	6	8	6	7	5	10	7	11	10	8	78	1.17367	1.29491	1.0315	9.62289				91.6	11.8667
SA22	1	26	2	77	2	2	1.5	1.8	31	13	1	12	26	24	27	24	18	9	5	6	8	6	8	9	12	8	6	77	1.10082	1	1	8.53229	64.9	35.1	26.5	71.8	0.6
SA23	1	22	2	70	1	1	1.3	1.8	28	38	30	26	94	22	17	16	11	7	8	5	5	5	9	6	11	8	6	70	1.01425	1	1	6.90893	64.1	36.1	21	46.7333	3.66667
SA24	1	29	2	76	1	1	1.1	1.6	19	50	45	19	114	22	19	22	16	6	5	6	5	7	9	6	12	10	10	76	1.11373	1.11423	1.01246	8.3666	61.2	27.8	13.6	69	10.8667
SA25	1	22	2	78	1	1	1.1	1.6	20	17	5	10	32	17	25	16	13	8	7	7	6	5	10	8	10	9	8	78	1.064	1.18059	1.06082	5.57973	60.6	32.3	11.9	30.1333	0
SA27	2	21	2	132	1	1	1	1.6	41	36	12	9	57	18	21	15	9	14	13	12	13	13	11	9	16	16	15	132	1.0202	1.04336	1.01915	8.79394	67.1	22	9.2	76.3333	3.93333
SA28	1	26	1	81	1	1	1.3	2	34	39	24	8	71	21	7	23	6	11	12	5	11	5	5	5	11	10	6	81	1.0029	1.06236	1.0181	7.07578	55.6	39.3	10.7	49.0667	15.7333
SA29	2	24	1	123	1	1	1.5	2.6	36	36	28	24	88	10	9	9	8	13	11	15	11	12	10	12	15	13	11	123	1.1646	1.20408	1.15198	2.81662	42.1	32.7	11.9	6.93333	0.733333
SA30	1	22	2	79	1	1	1	1.6	20	34	24	21	79	20	16	19	12	8	7	7	8	7	8	9	9	9	7	79	1.00464	1	1	7.53215	73.9	46.5	32.5	55.7333	11.7333
SA31	1	25	1	80	1	1	1.3	2	19	30	10	13	53	22	27	19	19	8	9	8	7	5	9	5	12	10	7	80	1.09873	1.07838	1.11469	7.65506	76.8	49.5	18.3	57.6	1.06667
SA32	2	21	2	123	1	1	0.9	1.4	31	34	9	27	70	17	22	19	10	12	9	14	10	12	10	10	18	15	13	123	1	1	1	5.54377	48.7	34.1	17.4	29.7333	6.2
SA33	2	18	1	143	1	1	1.2	1.7	30	27	14	32	73	12	21	19	12	14	12	16	16	14	15	13	18	11	14	143	1.03711	1.08106	1.16636	7.69848	51.6	35.5	20.4	58.2667	11.6
SA34	2	23	2	126	1	1	1.3	2	33	35	10	8	53	20	23	17	8	12	10	12	14	14	16	14	17	9	8	126	1.02411	1.00449	1.07347	3.41565	45.5	28.2	4.5	10.6667	3.6
SA35	2	21	1	129	2	2	1.6	2.4	22	26	29	35	90	18	19	20	11	11	14	17	12	9	11	8	14	14	19	129	1.02937	1.03213	1.01223	5.31664				27.2667	2.2
SA37	2	20	1	123	2	2	1.3	2	50	26	29	35	90	18	19	20	11	16	11	9	17	13	18	13	14	7	5	123	1.0761	1.02976	1.01186	3.37639	68.4	43.4	27.6	10.4	0.266667
